# Supplementary material for: Lipopolysaccharide-Induced Nitric Oxide and Prostaglandin E2 Production Is Inhibited by Tellimagrandin II in Mouse and Human Macrophages
Source: MDPI journal article supplement (doi:10.3390/life11050411), 2021-04-30

Supplementary Materials

# Lipopolysaccharide-Induced Nitric Oxide and Prostaglandin E2 Production Is Inhibited by Tellimagrandin II in Mouse and Human Macrophages

**Table S1.** Primer design for the NOS2, COX-2 and GAPDH genes.

| Gene name | Primer    | Sequences (5'-3')           |
|-----------|-----------|-----------------------------|
| NOS2      | Sense     | CCCTCCGAAGTTTCTGGCAGCAGC    |
|           | Antisense | GGCTGTCAGAGAGCCTCGTGGCTTTGG |
| COX-2     | Sense     | CATTGATGGTGGCTGTTTTG        |
|           | Antisense | GTTGCTGGGGGAAGAAATGT        |
| GAPDH     | Sense     | TCCACCACCCTGTTGCTGTA        |
|           | Antisense | ACCACAGTCCATGCCATCAC        |

**Figure S1.** Whole blot showing all the bands of Western blot in Figure 2(C) are summarized.

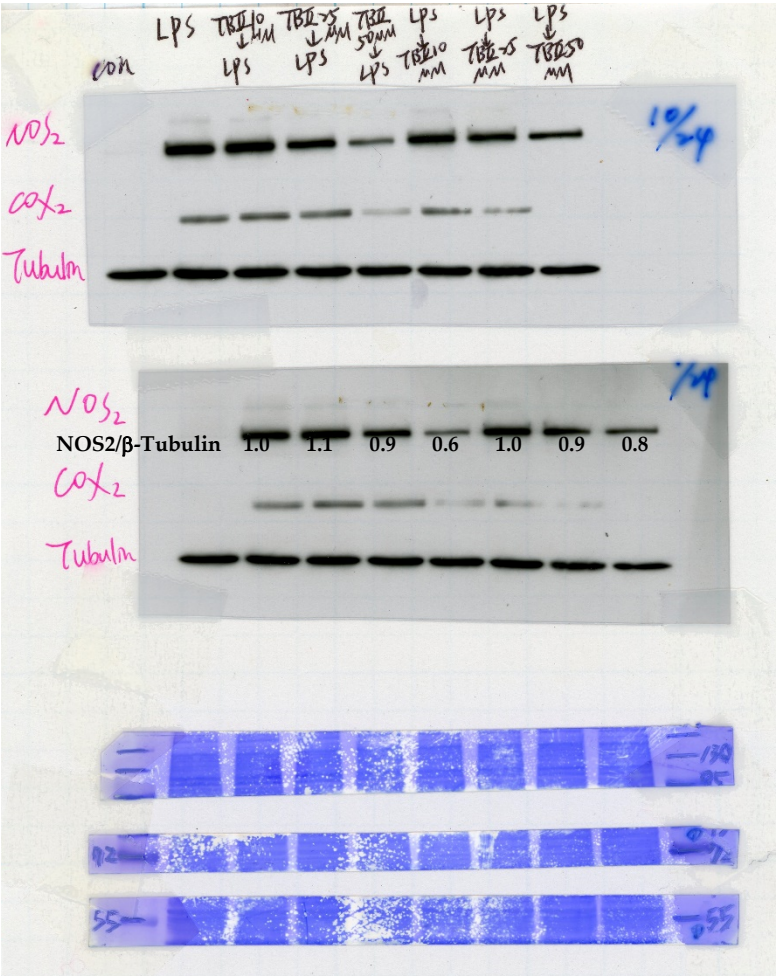



Figure S2. Whole blot showing all the bands of Western blot in Figure 3(A) are summarized.

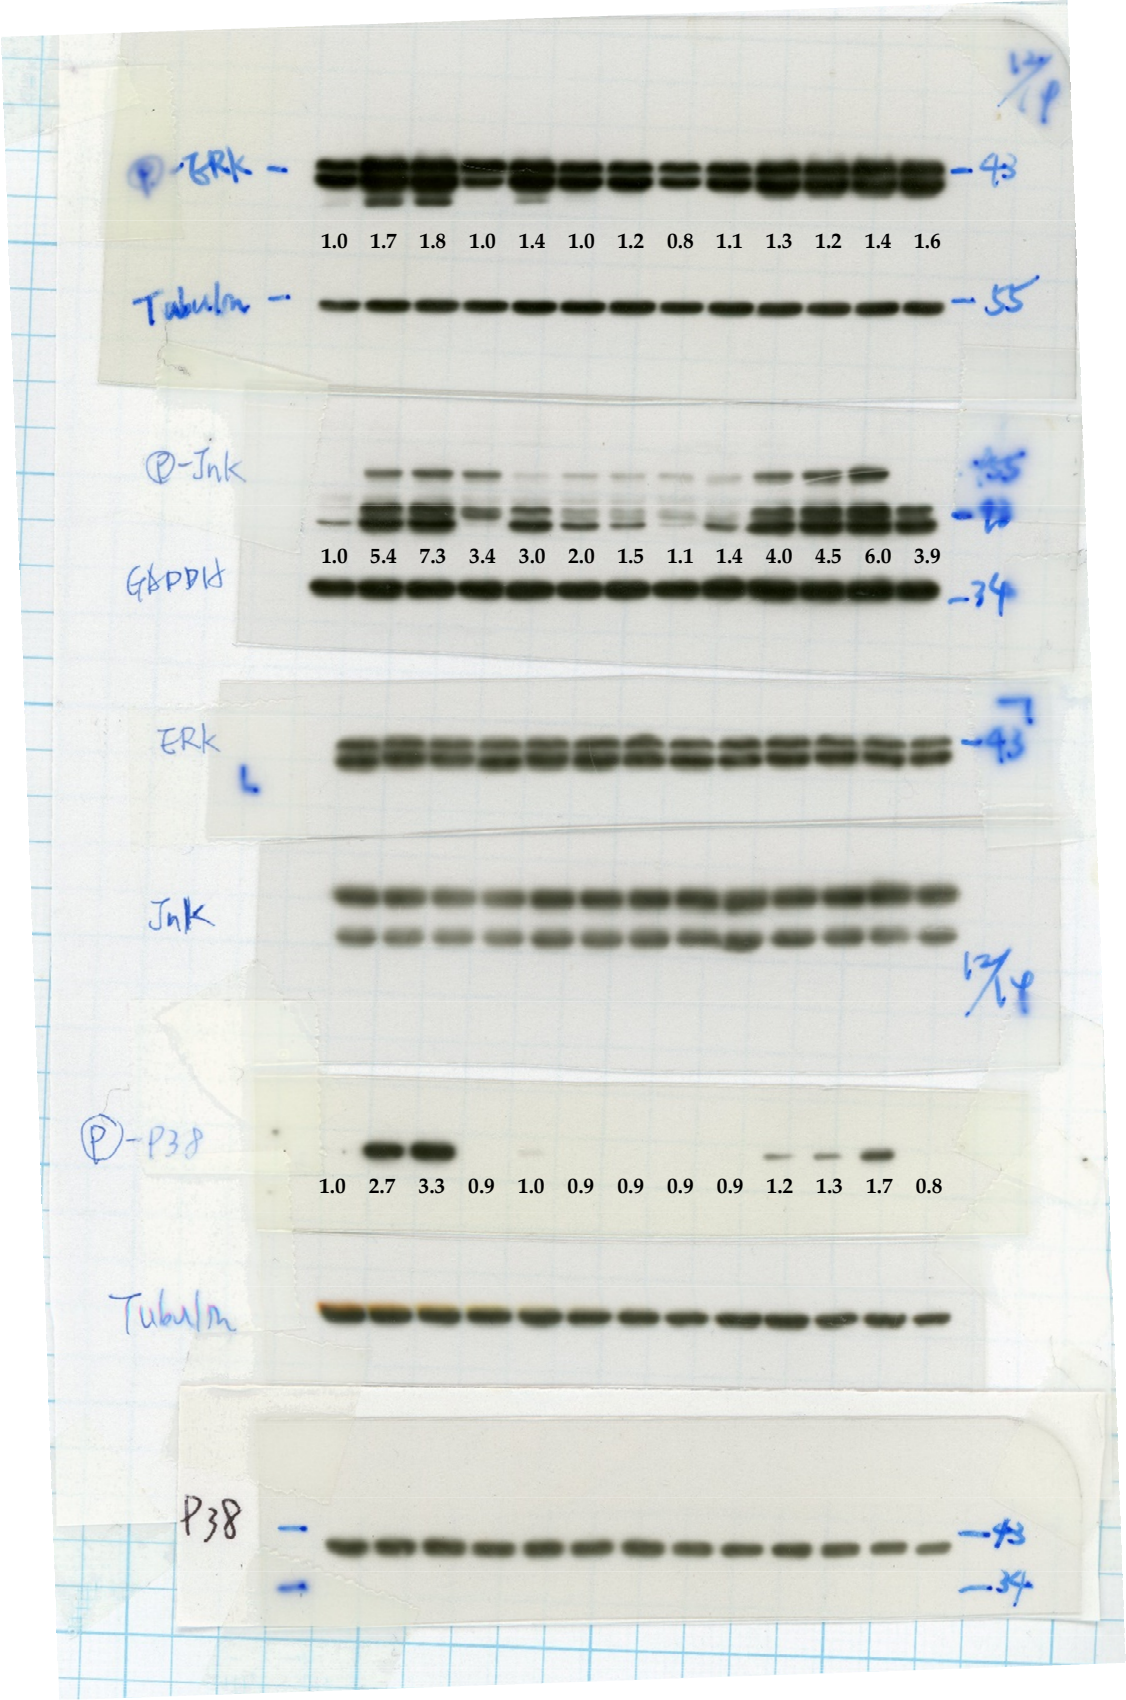

**Figure S3.** Whole blot showing all the bands of Western blot in Figure 4(A) are summarized.

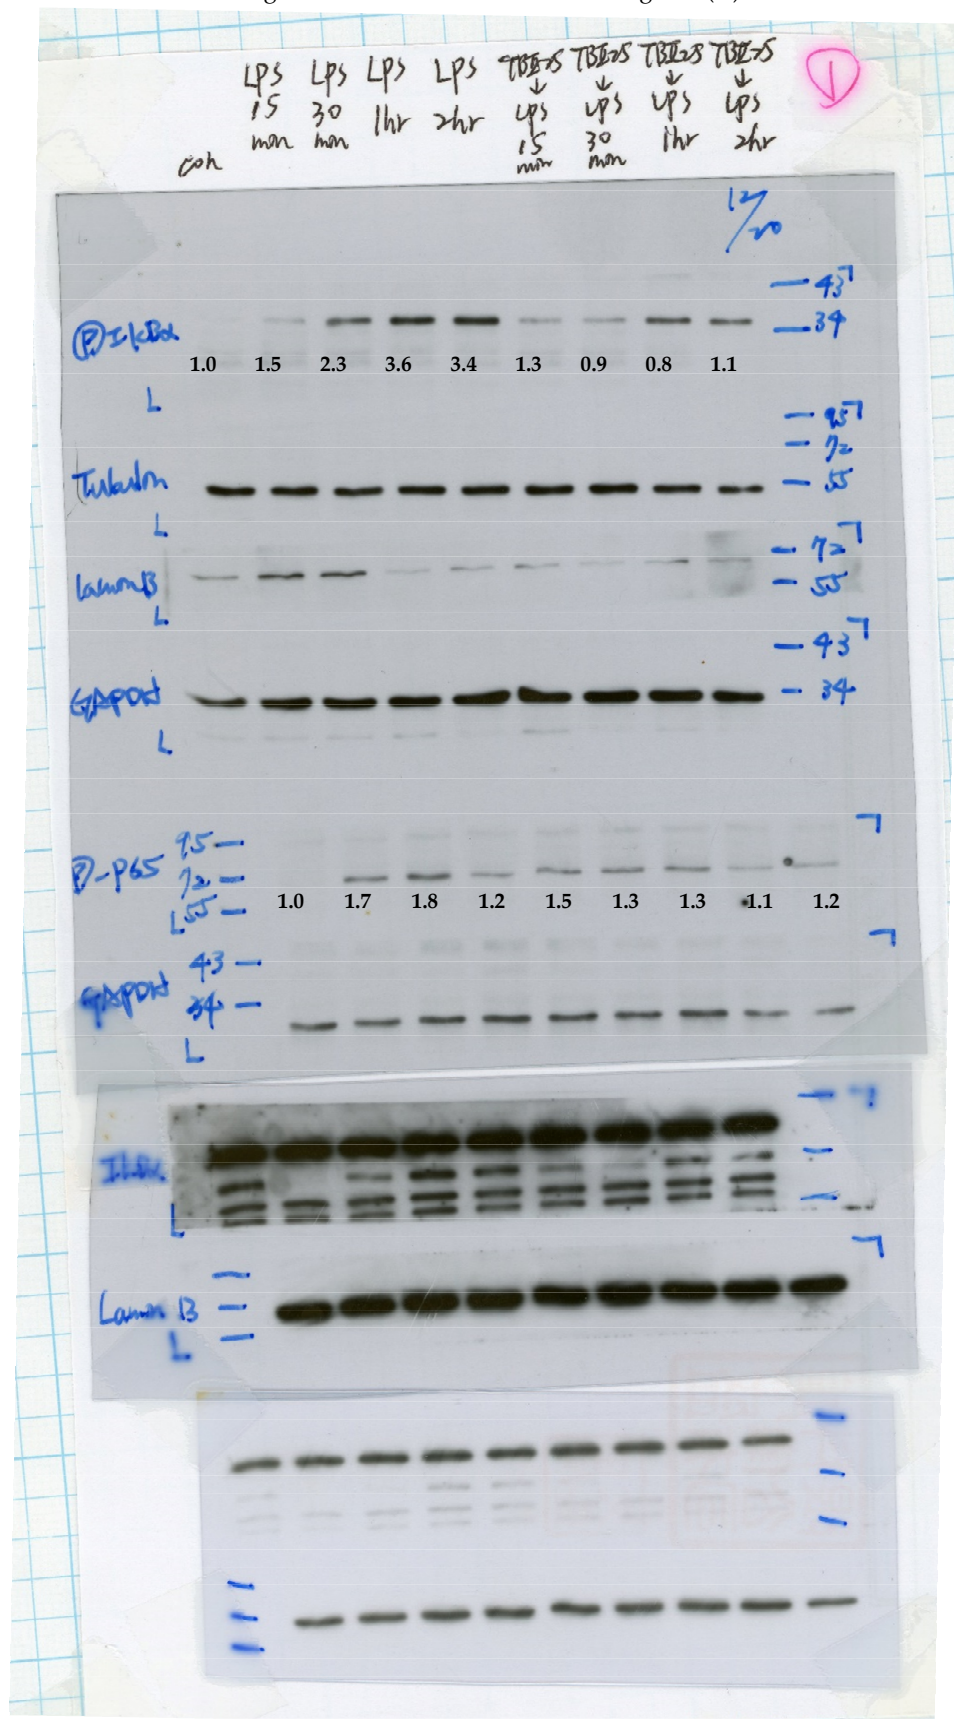



Figure S4. Whole blot showing all the bands of Western blot in Figure 4(B) are summarized.

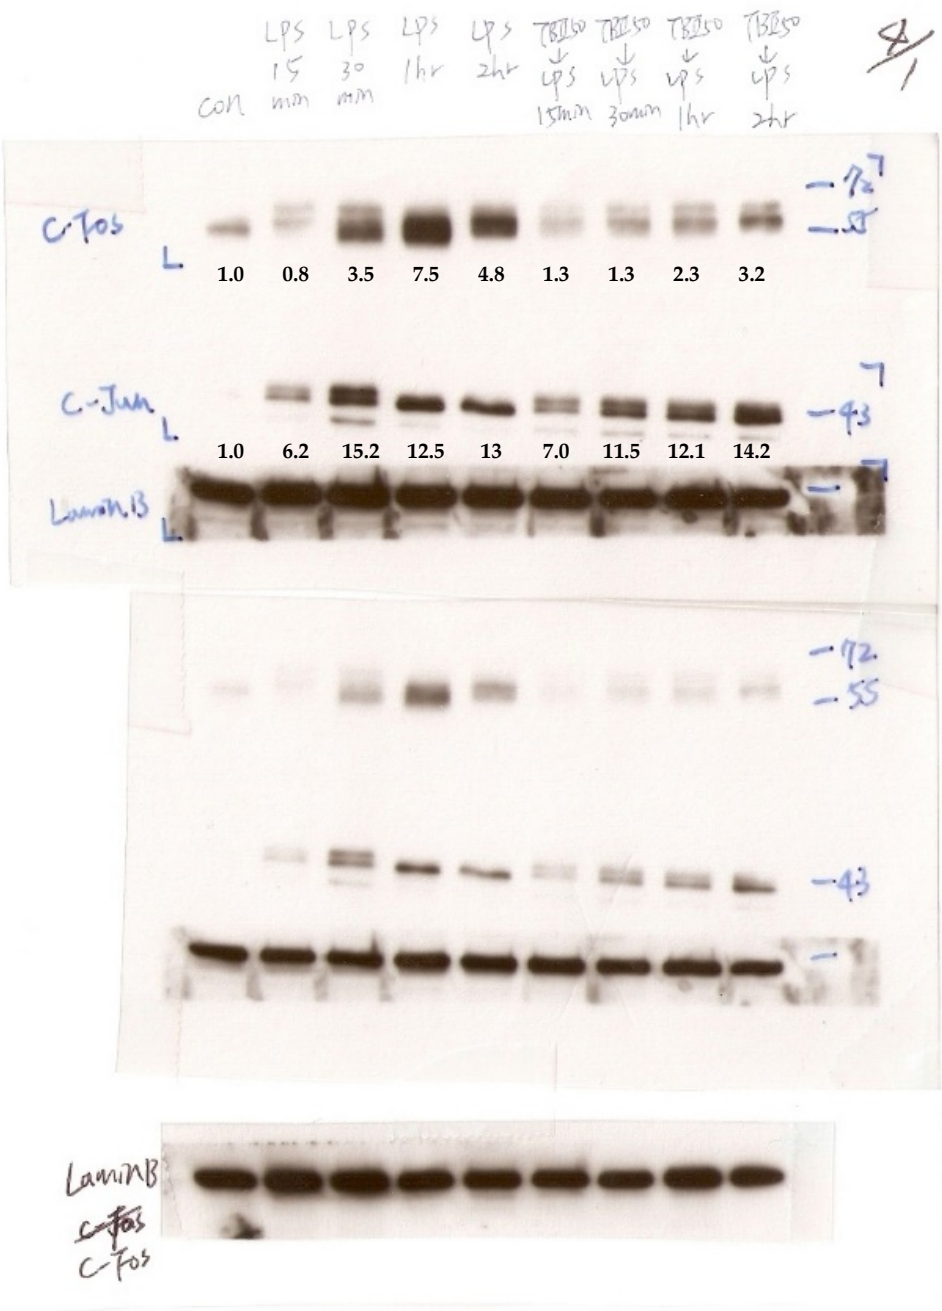

Figure S5. Whole blot showing all the bands of Western blot in Figure 5(B) are summarized.

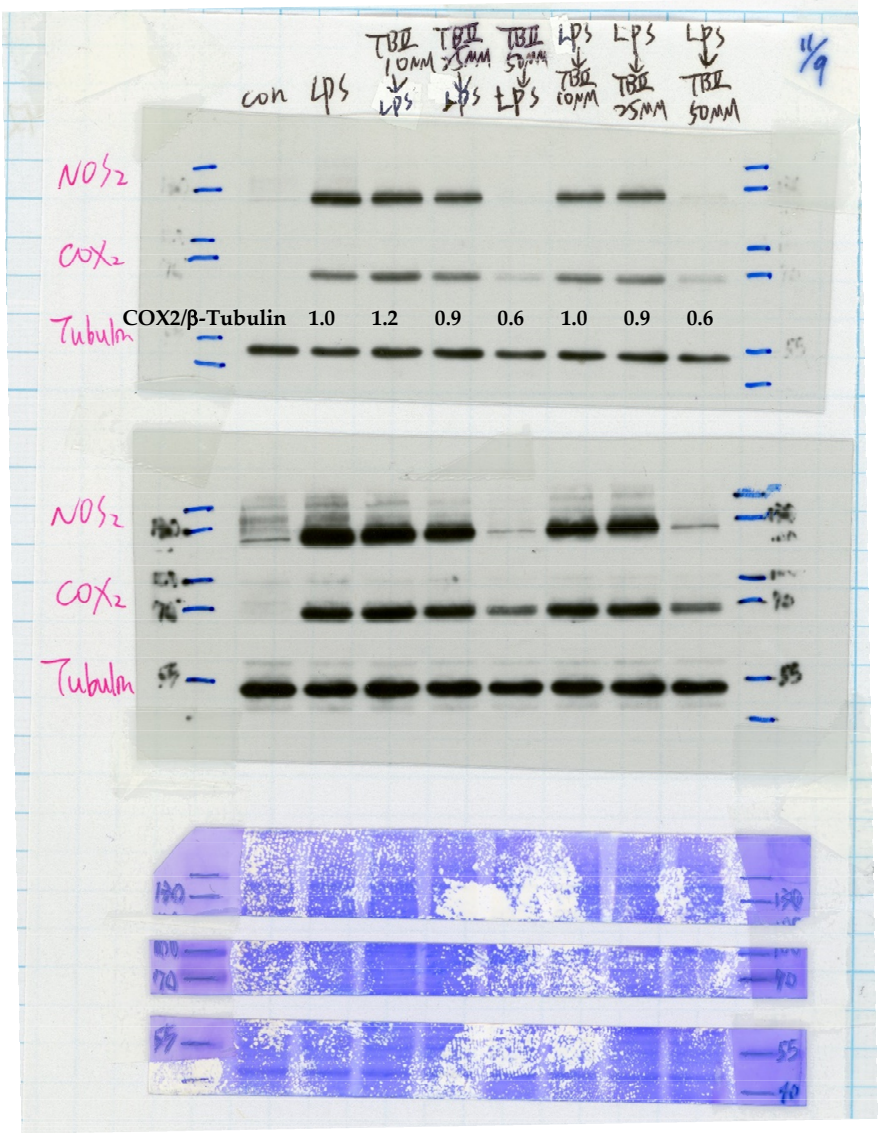

Supplement: s1 [file s1]
